# Supplementary material for: The Barley stripe mosaic virus γb protein promotes chloroplast-targeted replication by enhancing unwinding of RNA duplexes
Source: PubMed Central journal article supplement (PMC5397070; doi:10.1371/journal.ppat.1006319), 2017-04-07
Supplement: ppat.1006319.s001.pdf [file ppat.1006319.s001.pdf]

**S1 Table. Primers used for vector construction in this work**

| Primer sequence (5'-3') <sup>a</sup> |                                                        | Position and description <sup>b</sup>         | Purpose                                                                                                           | Experiment                             |
|--------------------------------------|--------------------------------------------------------|-----------------------------------------------|-------------------------------------------------------------------------------------------------------------------|----------------------------------------|
| F <sub>DONR-γb</sub>                 | GgggacaagttgtacaaaaagcaggctATGATGGCTACTTTCTCTTG        | RNA <sub>γ</sub> nt 2081-2100                 | pDONR-γb<br>pGWB5-γb (γb-GFP)<br>pGWB14-γb-3×Flag                                                                 | Subcellular localization               |
| R <sub>DONR-γb</sub>                 | GgggaccactttgtacaagaaagctgggtcCAACTTAGAAACGGAAGAA      | RNA <sub>γ</sub> nt 2537-2518                 |                                                                                                                   |                                        |
| R <sub>DONR-γb3Flag</sub>            | GgggaccactttgtacaagaaagctgggtcAAGCTTGTCATCGTCATCCTTG   | 3Flag nb 81-60                                |                                                                                                                   |                                        |
| F <sub>DONR-GFP</sub>                | GgggacaagttgtacaaaaagcaggctATGAGCAGTAAAGGAGAAGA<br>ACT | eGFP nb 1-23                                  | pGWB14-GFP                                                                                                        | Co-IP                                  |
| R <sub>DONR-GFP</sub>                | GgggaccactttgtacaagaaagctgggtcGCTAGCTTTGTATAGTTCAT     | eGFP nb 723-704                               |                                                                                                                   |                                        |
| F <sub>XhoI-GUS</sub>                | CCCTCGAGATGGTAGATCTGAGGGTAAATT                         | GUS nb 1-22, <i>Xho</i> I                     | pGD-GUS-3×Flag                                                                                                    | PCR analysis of<br>γb transgenic plant |
| R <sub>ApaI-GUS</sub>                | GGGCCCTTGTTTGCCCTCCCTGCTGCGGTTT                        | GUS nb 2024-2001, <i>Apa</i> I                |                                                                                                                   |                                        |
| F <sub>SalI-γb</sub>                 | GCGTCGACATGATGGCTACTTTCTCTTG                           | RNA <sub>γ</sub> nt 2081-2100, <i>Sal</i> I   | pGDRm-γb                                                                                                          | Subcellular localization               |
| R <sub>ApaI-γb</sub>                 | GGGGCCCCTTAGAAACGGAAGAAGAATC                           | RNA <sub>γ</sub> nt 2536-2516, <i>Apa</i> I   |                                                                                                                   |                                        |
| F <sub>XhoI-γb</sub>                 | CCCTCGAGATGATGGCTACTTTCTCTTG                           | RNA <sub>γ</sub> nt 2081-2100, <i>Xho</i> I   | pGD-γb<br>pGD-γb <sub>1-85</sub><br>pGD-γb <sub>1-127</sub><br>pGD-γb <sub>1130G</sub><br>pGD-γb <sub>1-85m</sub> | VSR activity assay                     |
| R <sub>BamHI-γb</sub>                | CGGGATCCTTACTTAGAAACGGAAGAAGA                          | RNA <sub>γ</sub> nt 2539-2519, <i>Bam</i> H I |                                                                                                                   |                                        |
| R <sub>BamHI-γb<sub>85</sub></sub>   | CGGGATCCTTAATGCTTTTGGCCACAGAACC                        | RNA <sub>γ</sub> nt 2335-2316, <i>Bam</i> H I |                                                                                                                   |                                        |
| R <sub>BamHI-γb<sub>127</sub></sub>  | CGGGATCCTTAAACCTCACTTTCAAGCTTAG                        | RNA <sub>γ</sub> nt 2461-2452, <i>Bam</i> H I |                                                                                                                   |                                        |
| F <sub>XbaI-αa</sub>                 | GCTCTAGAAATGGCTAGCGATGAGATTGT                          | RNA <sub>α</sub> nt 92-111, <i>Xba</i> I      | pSuper1300-αaGFP                                                                                                  | Subcellular localization               |
| R <sub>ApaI-αa</sub>                 | GGGCCCCAACTATATGAGATTCAAAG                             | RNA <sub>α</sub> nt 3505-3486, <i>Apa</i> I   |                                                                                                                   |                                        |

|                                                |                                       |                                               |                                                                                                                                                                      |                                           |                                              |                          |
|------------------------------------------------|---------------------------------------|-----------------------------------------------|----------------------------------------------------------------------------------------------------------------------------------------------------------------------|-------------------------------------------|----------------------------------------------|--------------------------|
| F <sub>XbaI</sub> - $\gamma$ a                 | TGCTCTAGAAATGGATGTTGTGAAGAAATTCG      | RNA $\gamma$ LIC nt 89-108, <i>Xba</i> I      | pSuper1300- $\gamma$ aGFP                                                                                                                                            | Subcellular localization                  |                                              |                          |
| R <sub>KpnI</sub> - $\gamma$ a                 | GGGGTACCCACTCGAAGTCTTTTCTCAGC         | RNA $\gamma$ LIC nt 2035-2014, <i>Kpn</i> I   |                                                                                                                                                                      |                                           |                                              |                          |
| F <sub>KpnI</sub> - $\gamma$                   | GGGGTACCAGATCTAACACCTCAAGTTGAATAT     | RNA $\gamma$ LIC nt 1093-1117, <i>Kpn</i> I   | pUC18-A <sub>RB</sub><br>pUC18-A <sub>RB</sub> Invert<br>pUC18-A<br><br>pCaBS- $\gamma_{\Delta\gamma b}$<br>pCaBS-(+) $\gamma b_{PUM}$<br>pCaBS-(-) $\gamma b_{PUM}$ | Northern blotting<br><br>RNA localization |                                              |                          |
| R <sub>BamHI</sub> - $\gamma$                  | CGGGATCCTGGTCTTCCCTTGGGGGACCGAAG      | RNA $\gamma$ LIC nt 2811-2788, <i>Bam</i> H I |                                                                                                                                                                      |                                           |                                              |                          |
| F-T <sub>3809</sub>                            | taattttgataGTTAAAAAAAAAAAAAATGTTTGATC | RNA $\gamma$ LIC nt 2555-2582                 |                                                                                                                                                                      |                                           |                                              |                          |
| R-T <sub>3794</sub>                            | aacttatctacaCTTAGAAACGGAAGAAGAATCATCA | RNA $\gamma$ LIC nt 2536-2512                 |                                                                                                                                                                      |                                           |                                              |                          |
| F <sub>Invert</sub> -T <sub>3809</sub>         | aacttatctacaTAAAAAAAAAAAAAATGTTTGATC  | RNA $\gamma$ LIC nt 2557-2582                 |                                                                                                                                                                      |                                           |                                              |                          |
| R <sub>Invert</sub> -T <sub>3794</sub>         | ttttgatagttCTTAGAAACGGAAGAAGAATCATCA  | RNA $\gamma$ LIC nt 2536-2512                 |                                                                                                                                                                      |                                           |                                              |                          |
| F <sub>KpnI</sub> - $\gamma b$                 | GTGGTACCTTAACTACAAG                   | RNA $\gamma$ nt 2109-2127, <i>Kpn</i> I       |                                                                                                                                                                      |                                           | pCaBS- $\gamma_{\gamma b\Delta 86-127}$ :GFP | Subcellular localization |
| R <sub>85</sub> - $\gamma b$                   | ATGCTTTTGGCCACAGAACCTAC               | RNA $\gamma$ LIC nt 2334-2312                 |                                                                                                                                                                      |                                           |                                              |                          |
| R <sub>HpaI</sub> -GFP                         | GAAGTAACTTTGATTCCATTC                 | eGFP nb 494-473, <i>Hpa</i> I                 |                                                                                                                                                                      |                                           |                                              |                          |
| F <sub>LIC</sub> -GFP                          | aaggaagttATGAGCAGTAAAGGAGAAGAACT      | eGFP nb 1-23                                  |                                                                                                                                                                      |                                           |                                              |                          |
| R <sub>LIC</sub> -GFP                          | aaccaccaccggttaGCTAGCTTTGTATAGTT      | eGFP nb 723-707                               | pCaBS- $\gamma_{\Delta\gamma b}$ :GFP                                                                                                                                | Subcellular localization                  |                                              |                          |
| F <sub><math>\Delta\gamma b</math>LIC</sub> -1 | CATGCGAAGGTAAATACAGTAGATTTAAAC        | RNA $\gamma$ LIC nt 2083-2054                 | pCaBS- $\gamma_{\gamma b86-127}$ :GFP                                                                                                                                |                                           |                                              |                          |
| F <sub>86</sub> - $\gamma b$                   | GCGGATCTGTATGATTCACTTCTGAAACGTTC      | RNA $\gamma$ LIC nt 2335-2366                 |                                                                                                                                                                      |                                           |                                              |                          |

|                                 |                                                        |                                                                |                                                                          |                                                      |
|---------------------------------|--------------------------------------------------------|----------------------------------------------------------------|--------------------------------------------------------------------------|------------------------------------------------------|
| F $\Delta$ $\gamma$ b           | TGTATTTACCTTCGCACTGACTGGCTACTTTCTCTTGTGTG<br>TGTTGTGG  | RNA $\gamma$ LIC nt 2066-2114<br>ATGATG $\rightarrow$ ACTGACTG | pCaBS- $\gamma$ <sub>yb</sub> ATGm                                       | Northern blotting                                    |
| R $\Delta$ $\gamma$ b           | CAAGAGAAAAGTAGCCAGTCAGTGCGAAGGTAAATACAG<br>TAGATTTAAAC | RNA $\gamma$ LIC nt 2102-2054                                  |                                                                          |                                                      |
| BS-3                            | GTATAGCTTGAGCATTACCGTC                                 | RNA $\gamma$ nt 1-22                                           | pCaBS- $\gamma$ <sub>yb1-127</sub><br>pCaBS- $\gamma$ <sub>yb</sub> :GFP | Northern blotting<br><br>Subcellular<br>localization |
| R <sub>BamHI</sub> - $\gamma$   | CGGGATCCTGGTCTTCCCTTGGGGGACCGAAG                       | RNA $\gamma$ LIC nt 2811-2788, <i>Bam</i> H I                  |                                                                          |                                                      |
| F <sub>KpnI</sub> - $\gamma$ b  | GTGGTACCTTAACTACAAG                                    | RNA $\gamma$ nt 2109-2127, <i>Kpn</i> I                        | pCaBS- $\gamma$ <sub>yb1130G</sub>                                       |                                                      |
| R <sub>HpaI</sub> - $\gamma$ b  | AACCTCACTTTCAAGCTTAG                                   | RNA $\gamma$ nt 2461-2442, <i>Hpa</i> I                        |                                                                          |                                                      |
| F <sub>I130G</sub> - $\gamma$ b | ACGCAGGACGTAAGTCCGTAGCTTCT                             | RNA $\gamma$ nt 2462-2488                                      |                                                                          |                                                      |
| R <sub>I130G</sub> - $\gamma$ b | TACGTCCTGCGTTAACCTCACTTTCAA                            | RNA $\gamma$ nt 2474-2448                                      |                                                                          |                                                      |
| F $\Delta$ <sub>ybLIC-2</sub>   | CGTCCATGGGCGAAGGTAAATACAGTAGATTTAAAC                   | RNA $\gamma$ nt 2079-2053                                      | pCaBS- $\gamma$ <sub><math>\Delta</math>yb:P19</sub>                     | Northern blotting                                    |
| R $\Delta$ <sub>ybLIC-2</sub>   | CGTACTAGTTAAGGAAGGGCCCGGTGGTGGTGGTTAA                  | RNA $\gamma$ nt 2532-2559                                      |                                                                          |                                                      |
| F <sub>NcoI</sub> -P19          | CATGCCATGGAACGAGCTATACAAGGAAACG                        | TBSV P19 nt 1-25, <i>Nco</i> I                                 |                                                                          |                                                      |
| R <sub>ApaI</sub> -P19          | GCGGGCCCTTACTCGCTTTCTTTTTCGAAGGTTG                     | TBSV P19 nt 519-492, <i>Apa</i> I                              |                                                                          |                                                      |
| F <sub>KpnI</sub> - $\gamma$    | GGGGTACCAGATCTAACACCTCAAGTTGAATAT                      | RNA $\gamma$ LIC nt 1093-1117, <i>Kpn</i> I                    |                                                                          |                                                      |
| F <sub>HpaI</sub> -GFP          | GCGTTAACATGAGCAGTAAAGGAGAAGA                           | eGFP nb 1-20, <i>Hpa</i> I                                     | pCa-BS- $\gamma$ <sub>yb1-127</sub> :GFP                                 | Subcellular<br>localization                          |
| R <sub>BamHI</sub> - $\gamma$   | CGGGATCCTGGTCTTCCCTTGGGGGACCGAAG                       | RNA $\gamma$ LIC nt 2811-2788, <i>Bam</i> H I                  |                                                                          |                                                      |
| F <sub>KpnI</sub> - $\gamma$    | GGGGTACCAGATCTAACACCTCAAGTTGAATAT                      | RNA $\gamma$ LIC nt 1093-1117, <i>Kpn</i> I                    |                                                                          |                                                      |

|                                              |                                                     |                                               |                                                         |                          |
|----------------------------------------------|-----------------------------------------------------|-----------------------------------------------|---------------------------------------------------------|--------------------------|
| F-GFP <sub>39</sub>                          | ATGAGCAGTAAAGGAGAAGAACTTTTCACTGGAGTTGTC             | eGFP nb 1-39                                  | pCaBS- $\gamma_{7b1-85}$ :GFP                           | Subcellular localization |
| R <sub>86-<math>\gamma</math>b33</sub>       | ATGCTTTTGGCCACAGAACCTACTCACGATTGG                   | RNA $\gamma$ LIC nt 2334-2302                 |                                                         |                          |
| F <sub>KpnI-<math>\gamma</math>b</sub>       | GTGGTACCTTAACTACAAG                                 | RNA $\gamma$ nt 2109-2127, <i>Kpn</i> I       |                                                         |                          |
| R <sub>BamHI-<math>\gamma</math></sub>       | CGGGATCCTGGTCTTCCCTTGGGGGACCGAAG                    | RNA $\gamma$ LIC nt 2811-2788, <i>Bam</i> H I |                                                         |                          |
| F <sub>KpnI-<math>\gamma</math>bRE</sub>     | CTTTCTCTTGTGTGTGTGTGGTACCTTAACTACAAGTACTACTGTGGT    | RNA $\gamma$ LIC nt 2090-2139, <i>Kpn</i> I   |                                                         |                          |
| F <sub>GAD-<math>\gamma</math></sub>         | GTATTTGGTGGTGCTGATTCATTGATATTGTTTGATCAGG GATA       | RNA $\gamma$ LIC nt 1577-1620                 | pCaBS- $\gamma_{7a}$ GDDm                               | Northern blotting        |
| R <sub>GAD-<math>\gamma</math></sub>         | TATCAATGAATCAGCACCACCAAATACACAGAAATGTGC ATCT        | RNA $\gamma$ LIC nt 1603-1561                 |                                                         |                          |
| R <sub>BamHI-<math>\gamma</math></sub>       | CGGGATCCTGGTCTTCCCTTGGGGGACCGAAG                    | RNA $\gamma$ LIC nt 2811-2788, <i>Bam</i> H I | pCa-BS- $\gamma_{7b1-85}$<br>pCa-BS- $\gamma_{7b1-85m}$ | Northern blotting        |
| R <sub><math>\Delta\gamma</math>bLIC-1</sub> | TAAGGAAGGGCCCGGTGGTGGTGGTTAA                        | RNA $\gamma$ LIC nt 2523-2560                 |                                                         |                          |
| R <sub>86-<math>\gamma</math>b33</sub>       | ATGCTTTTGGCCACAGAACCTACTCACGATTGG                   | RNA $\gamma$ LIC nt 2334-2302                 |                                                         |                          |
| F <sub>BM26-<math>\gamma</math>b</sub>       | GATGTGAGCAAACCATGTATATTCTGAAACAAG                   | RNA $\gamma$ LIC nt 2145-2177                 |                                                         |                          |
| R <sub>BM26-<math>\gamma</math>b</sub>       | TATACATGGTTTTGCTCACATCTCTTACCACAGTA                 | RNA $\gamma$ LIC nt 2165-2131                 |                                                         |                          |
| F <sub>MET-<math>\alpha</math>a</sub>        | acgtaccagattacgctcatATGGCTAGCGATGAGATTGTC           | RNA $\alpha$ nt 92-112                        | pGADT7- $\alpha$ a <sub>MET</sub>                       | Yeast two-hybrid         |
| R <sub>MET-<math>\alpha</math>a</sub>        | tatcgatgccaccctctagaCAACTCAAATCTCAGAGGTCTA          | RNA $\alpha$ nt 2593-2572                     |                                                         |                          |
| F <sub>HEL-<math>\alpha</math>a</sub>        | acgtaccagattacgctcatATGATTGACGGAGTTCCTGGCTG         | RNA $\alpha$ nt 2594-2613                     | pGADT7- $\alpha$ a <sub>HEL</sub>                       | Yeast two-hybrid         |
| R <sub>HEL-<math>\alpha</math>a</sub>        | tatcgatgccaccctctagAAACTATATGAGATTCAAAAGTACGAA TAGG | RNA $\alpha$ nt 2593-2506                     |                                                         |                          |

|                                                    |                                  |                                               |                                          |                  |                                                |
|----------------------------------------------------|----------------------------------|-----------------------------------------------|------------------------------------------|------------------|------------------------------------------------|
| F <sub>BamHI</sub> - $\gamma$ b                    | CGGGATCCATGATGGCTACTTTCTCTTG     | RNA $\gamma$ nt 2081-2100, <i>Bam</i> H I     | pGADT7- $\gamma$ b<br>pGBKT7- $\gamma$ b | Yeast two-hybrid |                                                |
| R <sub>EcoRI</sub> - $\gamma$ b                    | CCATCGATTACTTAGAAACGGAAGAAG      | RNA $\gamma$ nt 2538-2519, <i>Eco</i> R I     |                                          |                  |                                                |
| F <sub>Δsel</sub> - $\alpha$ a                     | GCATTAATATGGCTAGCGATGAGATTGT     | RNA $\alpha$ nt 92-111, <i>Ase</i> I          | pGADT7- $\alpha$ a<br>pGBKT7- $\alpha$ a |                  |                                                |
| R <sub>XbaI</sub> - $\alpha$ a <sub>AD</sub>       | GCTCTAGATTAAACTATATGAGATTCAA     | RNA $\alpha$ nt 3508-3489, <i>Xba</i> I       |                                          |                  |                                                |
| F <sub>PstI</sub> - $\alpha$ a <sub>BD</sub>       | AACTGCAGTTAAACTATATGAGATTCAA     | RNA $\alpha$ nt 3508-3489, <i>Pst</i> I       |                                          |                  |                                                |
| R <sub>EcoRI</sub> - $\alpha$ a-1                  | CTCACCAAGTGGAAATTCGCCC           | RNA $\alpha$ nt 1711-1691, <i>Eco</i> R I     |                                          |                  |                                                |
| F <sub>EcoRI</sub> - $\alpha$ a                    | GGGCGAATTCCTTGGTGAG              | RNA $\alpha$ nt 1691-1711, <i>Eco</i> R I     |                                          |                  |                                                |
| F <sub>NdeI</sub> - $\gamma$ b <sub>86-127</sub>   | GGAATTCATATGGCGGATCTGTATGATTCACT | RNA $\gamma$ LIC nt 2336-2355, <i>Nde</i> I   | pGBKT7- $\gamma$ b <sub>86-127</sub>     |                  |                                                |
| R <sub>EcoRI</sub> - $\gamma$ b <sub>86-127</sub>  | CGGAATTC AACCTCACTTTCAAGCTTAG    | RNA $\gamma$ LIC nt 2461-2442, <i>Eco</i> R I |                                          |                  |                                                |
| F <sub>NdeI</sub> - $\gamma$ b <sub>128-152</sub>  | GGAATTCATATGAACGCAATACGTAAGTCCG  | RNA $\gamma$ LIC nt 2462-2480, <i>Nde</i> I   | pGBKT7- $\gamma$ b <sub>128-152</sub>    |                  |                                                |
| R <sub>EcoRI</sub> - $\gamma$ b <sub>128-152</sub> | CGGAATTC TTAGAAACGGAAGAAGAATC    | RNA $\gamma$ LIC nt 2539-2516, <i>Eco</i> R I |                                          |                  |                                                |
| F <sub>BamHI</sub> - $\gamma$ b                    | CGGGATCCATGATGGCTACTTTCTCTTG     | RNA $\gamma$ nt 2081-2100, <i>Bam</i> H I     | pSPYNE- $\gamma$ b<br>pSPYCE- $\gamma$ b |                  | Bimolecular<br>fluorescence<br>complementation |
| R <sub>XhoI</sub> - $\gamma$ b                     | CCCTCGAGCTTAGAAACGGAAGAAGAATC    | RNA $\gamma$ nt 2536-2516, <i>Xho</i> I       |                                          |                  |                                                |
| F <sub>XbaI</sub> - $\alpha$ a                     | GCTCTAGAATGGCTAGCGATGAGATTGT     | RNA $\alpha$ nt 92-111, <i>Xba</i> I          | pSPYNE- $\alpha$ a<br>pSPYCE- $\alpha$ a |                  |                                                |
| F <sub>SpeI</sub> - $\alpha$ a                     | GGACTAGTAACTATATGAGATTCAAAAG     | RNA $\alpha$ nt 3486-3505, <i>Spe</i> I       |                                          |                  |                                                |

|                                 |                                                               |                                             |                                                                      |                                                |
|---------------------------------|---------------------------------------------------------------|---------------------------------------------|----------------------------------------------------------------------|------------------------------------------------|
| F <sub>SpeI</sub> - $\gamma$ a  | CGG <u>ACTAGT</u> ATGGATGTTGTGAAGAAATT                        | RNA $\gamma$ LIC nt 89-108, <i>Spe</i> I    | pSPYNE- $\gamma$ a<br>pSPYCE- $\gamma$ a                             | Bimolecular<br>fluorescence<br>complementation |
| R <sub>SalI</sub> - $\gamma$ a  | GCGT <u>CGACCC</u> ACTCGAAGTCTTTTCTCA                         | RNA $\gamma$ LIC nt 2035-2016, <i>Sal</i> I |                                                                      |                                                |
| F- $\alpha$ <sub>LRSV</sub>     | gctcaggcctggcgcgccactagtATGGCGAGTGATGAGATCGT                  | LRSV RNA $\alpha$ nt 88-107                 | pSPYNE- $\alpha$ <sub>LRSV</sub><br>pSPYCE- $\alpha$ <sub>LRSV</sub> |                                                |
| R- $\alpha$ <sub>LRSV</sub>     | catccgggagcgggtaccctcgagATTAACAATATGTTCTCTGAAAATA<br>CTTACAGG | LRSV RNA $\alpha$ nt 3510-3478              |                                                                      |                                                |
| F- $\alpha$ <sub>PSLV</sub>     | gctcaggcctggcgcgccactagtATGGCAAGTGACGAGATTGT                  | PSLV RNA $\alpha$ nt 116-135                | pSPYNE- $\alpha$ <sub>PSLV</sub><br>pSPYCE- $\alpha$ <sub>PSLV</sub> |                                                |
| R- $\alpha$ <sub>PSLV</sub>     | catccgggagcgggtaccctcgagCTCTACAATATGCGATTGGAAAGTC             | PSLV RNA $\alpha$ nt 3574-3550              |                                                                      |                                                |
| F- $\gamma$ <sub>LRSV</sub>     | gctcaggcctggcgcgccactagtATGGCATCTTACCTAATGT                   | LRSV RNA $\alpha$ nt 1979-1988              | pSPYNE- $\gamma$ <sub>LRSV</sub><br>pSPYCE- $\gamma$ <sub>LRSV</sub> |                                                |
| R- $\gamma$ <sub>LRSV</sub>     | catccgggagcgggtaccctcgagAAGCTTAGAACTATTGCGGAGA                | LRSV RNA $\alpha$ nt 2410-2389              |                                                                      |                                                |
| F- $\gamma$ <sub>PSLV</sub>     | gctcaggcctggcgcgccactagtATGTCAACCGACTTGTGTTC                  | PSLV RNA $\alpha$ nt 2345-2364              | pSPYNE- $\gamma$ <sub>PSLV</sub><br>pSPYCE- $\gamma$ <sub>PSLV</sub> |                                                |
| R- $\gamma$ <sub>PSLV</sub>     | catccgggagcgggtaccctcgagGAGTTTACTTAGTTTGAAAAAATC<br>CGCC      | PSLV RNA $\alpha$ nt 2875-2848              |                                                                      |                                                |
| F <sub>BamHI</sub> - $\gamma$ b | CGGGATCCATGATGGCTACTTTCTCTTG                                  | RNA $\gamma$ nt 2081-2100, <i>Bam</i> H I   | pGEX2T- $\gamma$ b<br>pGEX2T- $\gamma$ b <sub>BM26</sub>             | Protein expression                             |
| R <sub>EcoRI</sub> - $\gamma$ b | CCATCGATTTACTTAGAAACGGAAGAAG                                  | RNA $\gamma$ nt 2538-2519, <i>Eco</i> R I   |                                                                      |                                                |
| F <sub>NdeI</sub> - $\alpha$ a  | GGAATTC <u>CATATGG</u> TGGCCGTTCCATTGAACGC                    | RNA $\alpha$ nt 2252-2271, <i>Nde</i> I     | pDB.His.MBP- $\alpha$ <sub>HEL</sub>                                 |                                                |
| R <sub>XhoI</sub> - $\alpha$ a  | CCGCTCGAGAACTATATGAGATTCAAAAGTACG                             | RNA $\alpha$ nt 3505-3482, <i>Xho</i> I     |                                                                      |                                                |
| F <sub>HindIII</sub> -BS(-)     | CCAAGCTTTGGTCTTCCCTTGGGGGACC                                  | RNA $\gamma$ LIC nt 2790-2070               | pSPT19-BS(-)                                                         |                                                |
| R <sub>EcoRI</sub> -BS(-)       | CGGGATCCTGTTTGATCAGATCATTCAA                                  | RNA $\gamma$ LIC nt 2551-2571               |                                                                      |                                                |

|                                   |                                               |                                               |                                            |                                         |
|-----------------------------------|-----------------------------------------------|-----------------------------------------------|--------------------------------------------|-----------------------------------------|
| F <sub>HindIII</sub> - $\alpha$   | CCCA <u>AAGCTT</u> GCTTGGTGCCTCAGAAATTCTCGC   | RNA $\alpha$ nt 2872-2895, <i>Hind</i> III    | pSPT19- $\alpha$ aA<br>pSPT18- $\alpha$ aA | Probe preparation                       |
| R <sub>EcoRI</sub> - $\alpha$ a-2 | CGGA <u>ATTCT</u> TAAACTATATGAGATTCAAAAAGTACG | RNA $\alpha$ nt 3508-3482, <i>EcoR</i> I      |                                            |                                         |
| F-P19                             | ATGGAACGAGCTATACAAGGAAAC                      | TBSV P19 nt 1-24                              |                                            | PCR analysis of<br>p19 transgenic plant |
| R-P19                             | CTCGCTTTCTTTTTCGAAGGTTTGAG                    | TBSV P19 nt 515-489                           |                                            |                                         |
| BS-10                             | GGTGCTTGATGCTTTGGATAAGG                       | RNA $\gamma$ nt 1862-1884                     |                                            | Screening of<br>positive clones         |
| BS-32                             | TGGTCTCCCTTGGGGGAC                            | RNA $\alpha$ , $\beta$ , $\gamma$ 3'-terminus |                                            |                                         |

<sup>a</sup> Underlined letters indicate restriction enzyme sites, lowercase letters indicate sequence used for recombination. Shadowed letters indicate extra nucleotides introduced to the original sequence

<sup>b</sup> Numbers correspond to target nucleotide positions, a reverse order of numbers indicates that the primer is complementary to the target sequences. RNA $\alpha$ ,  $\beta$ , and  $\gamma$  indicate the BSMV components unless specifically noted.
