# Supplementary material for: The Barley stripe mosaic virus γb protein promotes chloroplast-targeted replication by enhancing unwinding of RNA duplexes
Source: PubMed Central journal article supplement (PMC5397070; doi:10.1371/journal.ppat.1006319), 2017-04-07
Supplement: ppat.1006319.s002.pdf [file ppat.1006319.s002.pdf]

**S2 Table. Sequences of single-stranded RNA used for preparation of the partial dsRNA duplex.**

|                                     | <b>Sequence (5'-3')</b>                                                                                                                                          |
|-------------------------------------|------------------------------------------------------------------------------------------------------------------------------------------------------------------|
| <b>Template RNA strand (149 nt)</b> | 5'-GAGACCCAAGCUUGCAUGCCUGCAGGUCGACUCUAGAGGAUCCCCGGGUACCGAGCUCGAAUCCG<br>UGUAUUCUAUAGUGUCACCUAAAUCGUAUGUGUAUGAUACAUAAGGUUAUGUAUAAAUUGUAGCCGC<br>GUUCUAACGACAAU-3' |
| <b>Release RNA strand (55 nt)</b>   | 5'- <u>CGAGCUCGGUACCCGGGAUCCUCUAGAGUCGACCUGCAGGCAUGCAAGCUUGG</u> -3'                                                                                             |
